# Supplementary material for: Cytotoxic Effects of New Palladium(II) Complexes with Thiazine or Thiazoline Derivative Ligands in Tumor Cell Lines
Source: MDPI journal article supplement (doi:10.3390/pharmaceutics15020696), 2023-02-18
Supplement: s1 [file s1]

# Cytotoxic Effects of New Palladium(II) Complexes with Thiazine or Thiazoline Derivative Ligands in Tumor Cell Lines

Elena Fernández-Delgado <sup>1</sup>, Samuel Estirado <sup>1</sup>, Ana B. Rodríguez <sup>1</sup>, Francisco Luna-Giles <sup>2</sup>, Emilio Viñuelas-Zahínos <sup>2,\*</sup>, Javier Espino <sup>1,\*</sup> and José A. Pariente <sup>1</sup>

<sup>1</sup> Neuroimmunophysiology and Chrononutrition Research Group, Department of Physiology, Faculty of Science, University of Extremadura, 06006 Badajoz, Spain; elenafd@unex.es (E.F.-D.); estirado@unex.es (S.E.); moratino@unex.es (A.B.R.); pariente@unex.es (J.A.P.)

<sup>2</sup> Coordination Chemistry Research Group, Department of Organic and Inorganic Chemistry, Faculty of Science, University of Extremadura, 06006 Badajoz, Spain; pacoluna@unex.es

\* Correspondence: emilvin@unex.es (E.V.-Z.); jespino@unex.es (J.E.); Tel.: +34-924286854 (E.V.-Z.); +34-924289796 (J.E.)

**Table S1.** Dihedral angles (°) between the planes Cl(1)-Pd-Cl(2) and N(1)-Pd-N(3) in PdPzTn, PdPzTz, PdDMPzTn, PdDMPzTz PdDPhPzTn and PdDPhPzTz complexes

|                                                        | PdPzTn | PdPzTz | PdDMPzTn | PdDMPzTz | PdDPhPzTn | PdDPhPzTz |
|--------------------------------------------------------|--------|--------|----------|----------|-----------|-----------|
| Dihedral angle between Cl(1)-Pd-Cl(2) and N(1)-Pd-N(3) | 0.0    | 4.13   | 2.61     | 4.65     | 5.68      | 7.69      |

**Table S2.** Torsion angles (°) for PdPzTn, PdPzTz, PdDMPzTn, PdDMPzTz PdDPhPzTn and PdDPhPzTz complexes and their respective ligands

|                  | PdPzTn      | PdPzTz      | PdDMPzTn       | PdDMPzTz       | PdDPhPzTn      | PdDPhPzTz      |
|------------------|-------------|-------------|----------------|----------------|----------------|----------------|
| S-C(1)-N(2)-N(3) | - 180.0     | 174.9(1)    | 179.3(6)       | 173.1(2)       | - 164.8(1)     | 158.7(1)       |
|                  | <b>PzTn</b> | <b>PzTz</b> | <b>DMPzTn*</b> | <b>DMPzTz*</b> | <b>DPhPzTn</b> | <b>DPhPzTz</b> |
|                  | -4.7(2)     | -17.9(2)    | -              | -              | 0.6(2)         | -50.7(2)       |

\*DMPzTn and DMPzTz are oils, so X-ray diffraction data are not available.

**Table S3.** IR spectral assignments (cm<sup>-1</sup>) for PzTn, PdPzTn, DMPzTn, PdDMPzTn, DPhPzTn, and PdDPhPzTn.

|                          | PzTn | PdPzTn | DMPzTn | PdDMPzTn | DPhPzTn | PdDPhPzTn |
|--------------------------|------|--------|--------|----------|---------|-----------|
| W <sub>1</sub> [v(C=N)]  | 1641 | 1608   | 1635   | 1601     | 1639    | 1587      |
| Pyrazole ring vibrations | 1514 | 1532   | 1574   | 1571     | 1560    | 1556      |
|                          | 1382 | 1413   | 1410   | 1413     | 1408    | 1411      |
|                          | 1350 | 1371   | 1387   | 1397     | 1319    | 1314      |
|                          |      |        |        | 1378     |         |           |
|                          | 991  | 1001   | 970    | 973      | 1000    | 996       |

**Table S4.** IR spectral assignments (cm<sup>-1</sup>) for PzTz, PdPzTz, DMPzTz, PdDMPzTz, DPhPzTz, and PdDPhPzTz.

|                          | PzTz | PdPzTz | DMPzTz | PdDMPzTz | DPhPzTz | PdDPhPzTz |
|--------------------------|------|--------|--------|----------|---------|-----------|
| Ψ <sub>1</sub> [v(C=N)]  | 1635 | 1596   | 1639   | 1592     | 1639    | 1606      |
| Pyrazole ring vibrations | 1510 | 1524   | 1566   | 1564     | 1548    | 1556      |
|                          | 1419 | 1441   | 1411   | 1404     | 1406    | 1404      |
|                          | 1386 | 1413   | 1375   | 1382     |         |           |
|                          | 1327 | 1358   | 1315   | 1341     | 1303    | 1313      |
|                          | 995  | 1003   | 981    | 991      | 998     | 1000      |

**Table S5.** <sup>1</sup>H NMR spectral data for PzTn, PdPzTn, DPhPzTn and PdDPhPzTn complexes in DMF-d<sub>7</sub> solvent and for DMPzTn and PdDMPzTn in DMSO-d<sub>6</sub>.

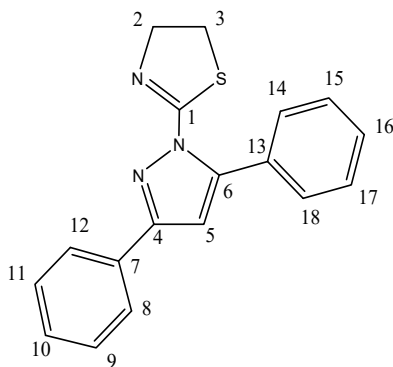

| Compound  | N-CH <sub>2</sub> | S-CH <sub>2</sub> | H(4) | H(5) | H(6) | CH <sub>3</sub> | H(8-18)   |
|-----------|-------------------|-------------------|------|------|------|-----------------|-----------|
| PzTn      | 4.34              | 3.58              | 8.40 | 6.60 | 7.81 | -               | -         |
| PdPzTn    | 4.30              | 4.13              | 8.91 | 6.99 | 8.15 | -               | -         |
| DMPzTn    | 4.27              | 3.35              | -    | 6.12 | -    | 2.13 ; 2.46     | -         |
| PdDMPzTn  | 4.22              | 3.98              | -    | 6.60 | -    | 2.63 , 2.65     | -         |
| DPhPzTn   | 4.19              | 3.51              | -    | 7.20 | -    |                 | 7.46-8.08 |
| PdDPhPzTn | 4.22              | 3.78              | -    | 7.12 | -    |                 | 7.47-7.84 |



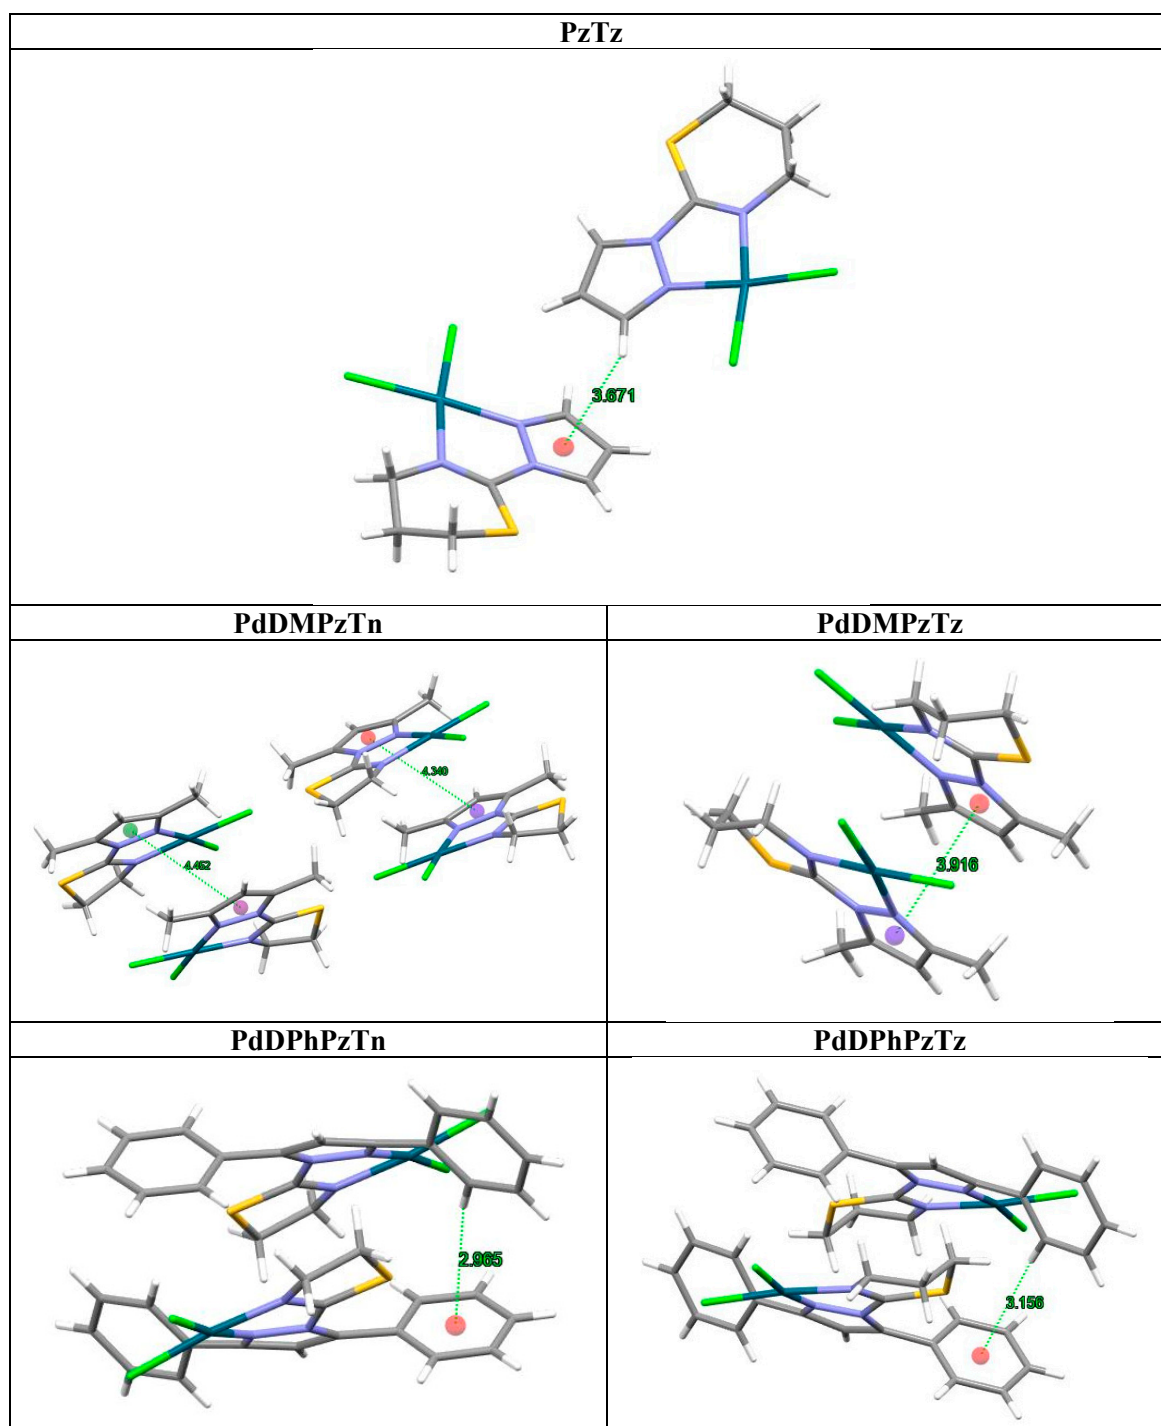

**Figure S1.** Aromatic interactions in PdPzTz, PdDMPzTn, PdDMPzTz, PdDPhPzTn and PdDPhPzTz.

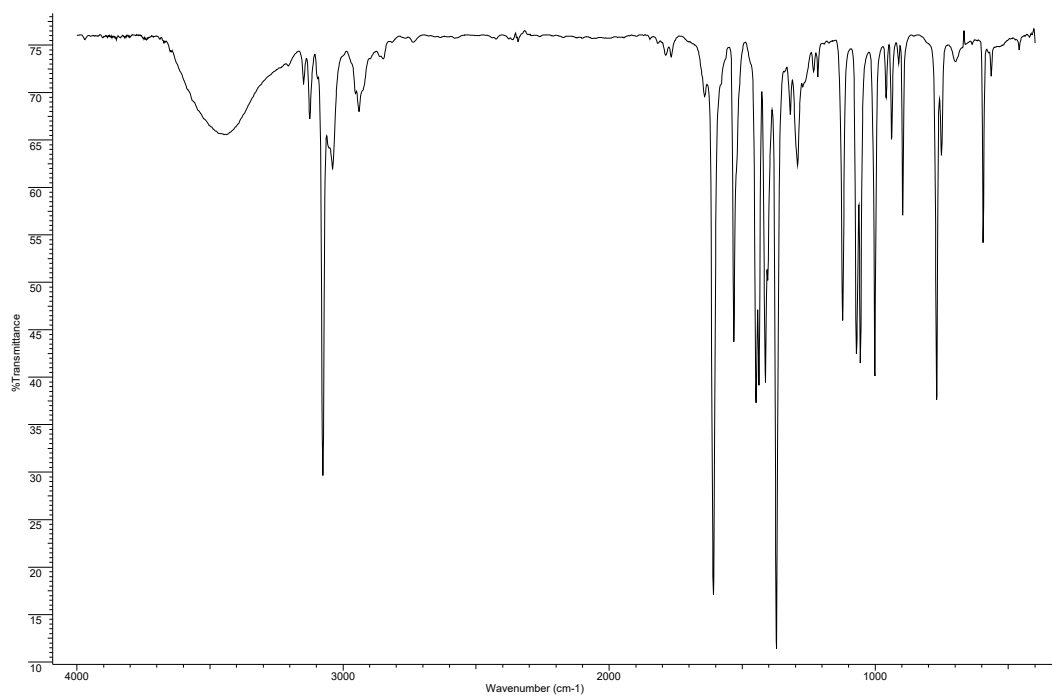

**Figure S2.** IR spectrum of [PdCl<sub>2</sub>(PzTn)] in 4000-400 cm<sup>-1</sup> region.

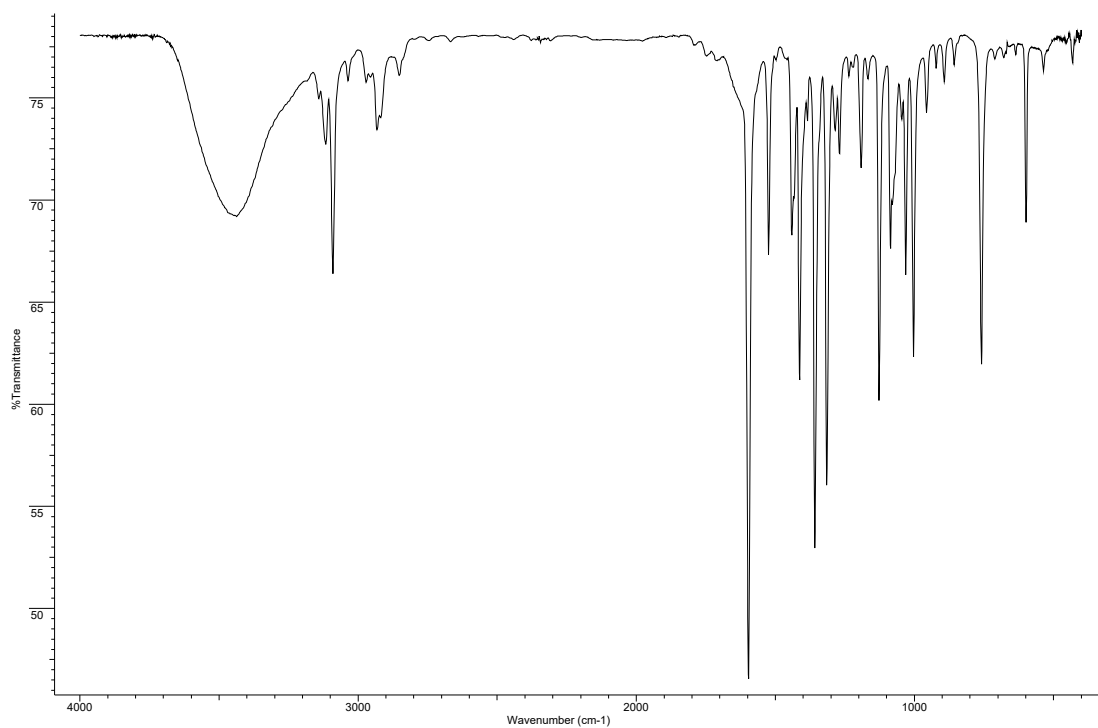

**Figure S3.** IR spectrum of [PdCl<sub>2</sub>(PzTz)] in 4000-400 cm<sup>-1</sup> region.

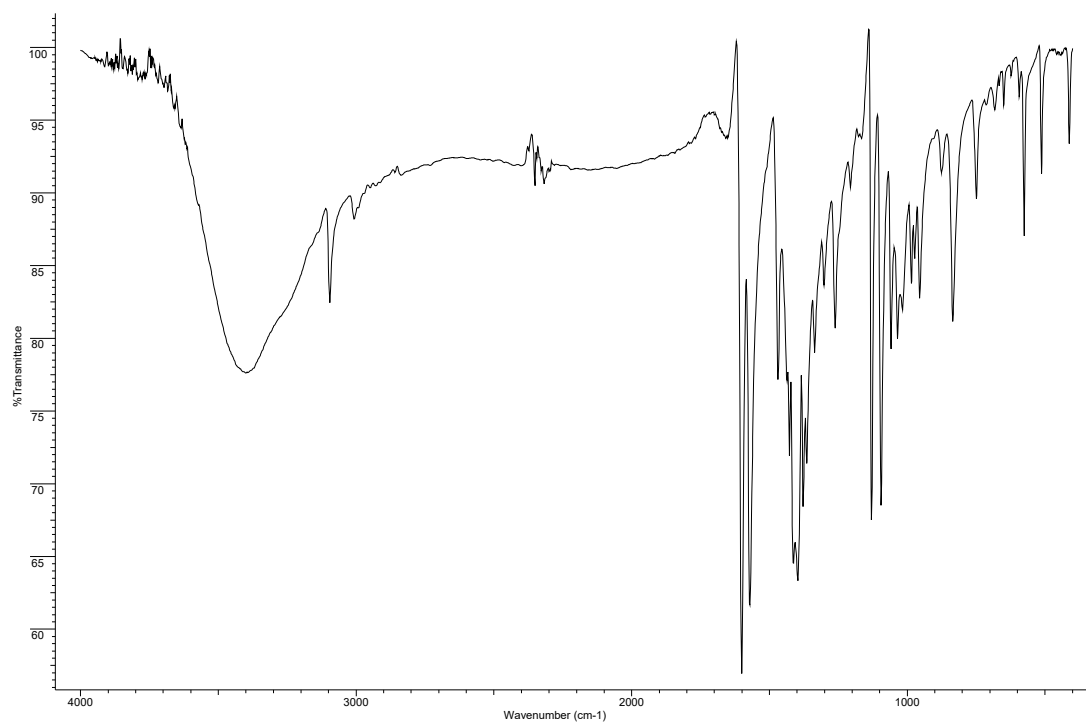

**Figure S4.** IR spectrum of [PdCl<sub>2</sub>(DMPzTn)] in 4000-400 cm<sup>-1</sup> region.

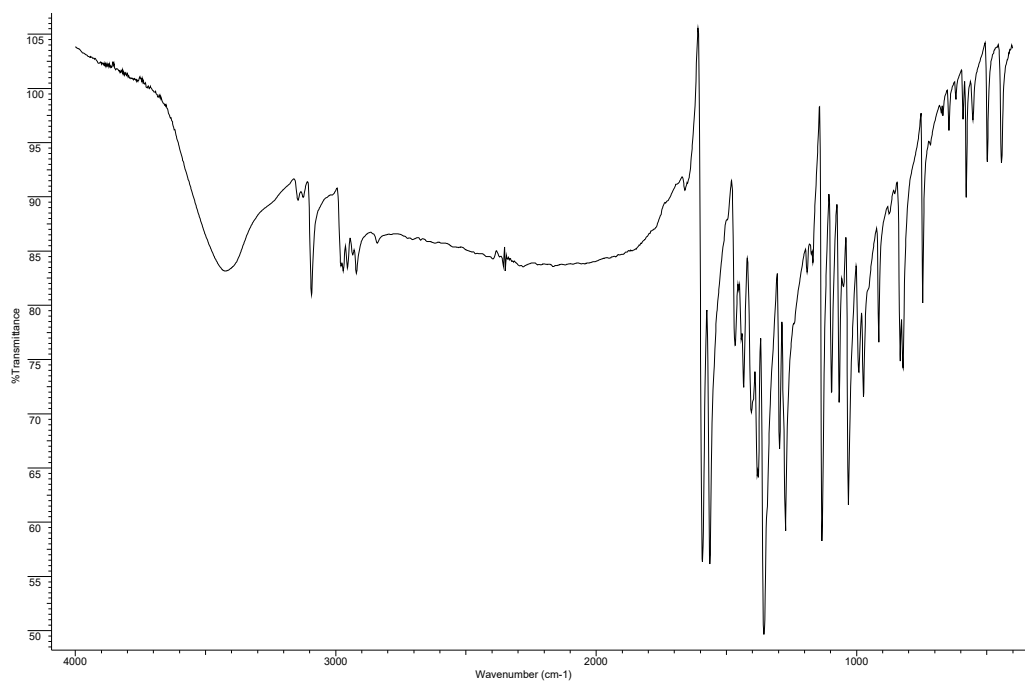

**Figure S5.** IR spectrum of [PdCl<sub>2</sub>(DMPzTz)] in 4000-400 cm<sup>-1</sup> region.

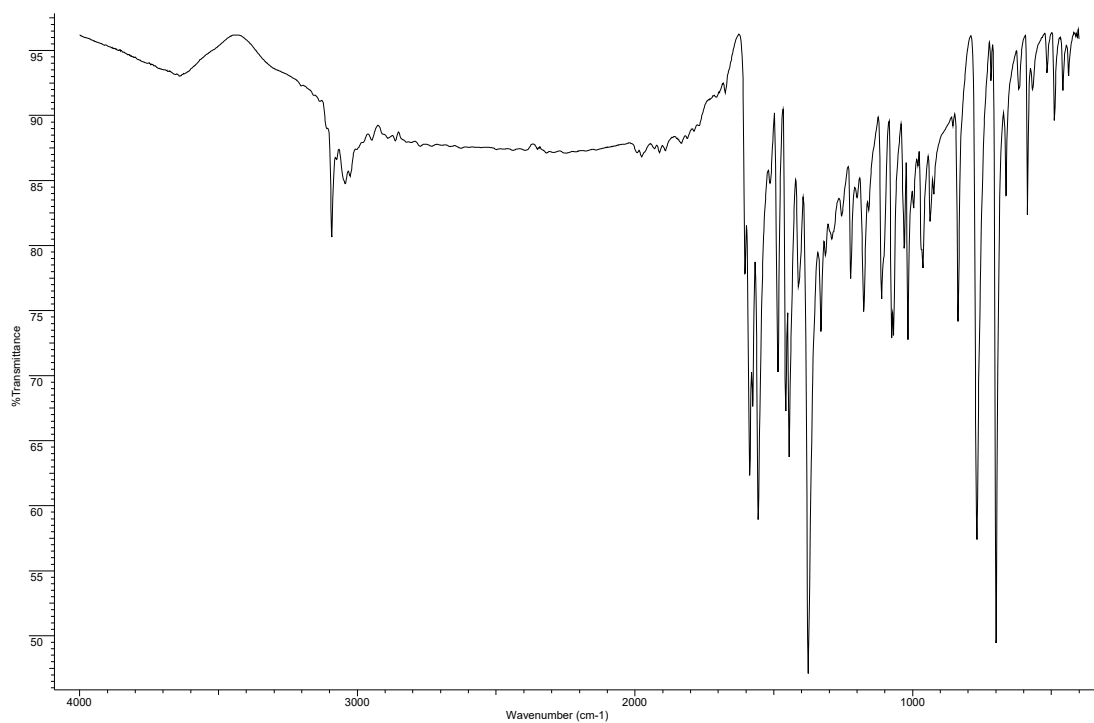

**Figure S6.** IR spectrum of [PdCl<sub>2</sub>(DPhPzTn)] in 4000-400 cm<sup>-1</sup> region.

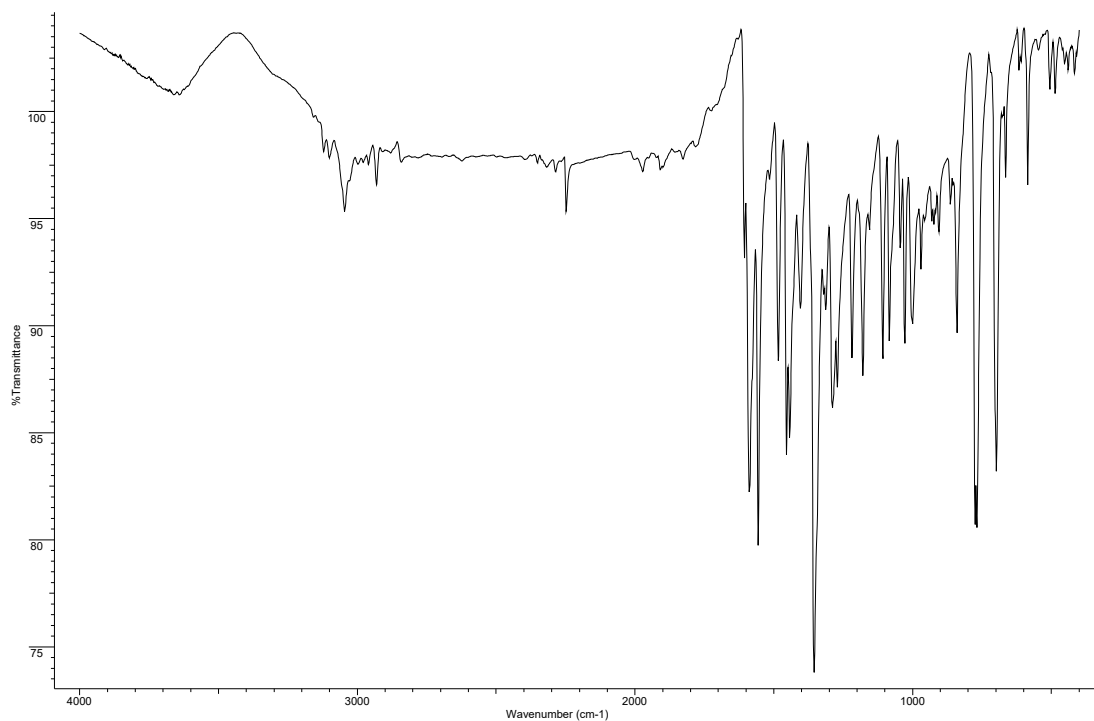

**Figure S7.** IR spectrum of [PdCl<sub>2</sub>(DPhPzTz)] in 4000-400 cm<sup>-1</sup> region.

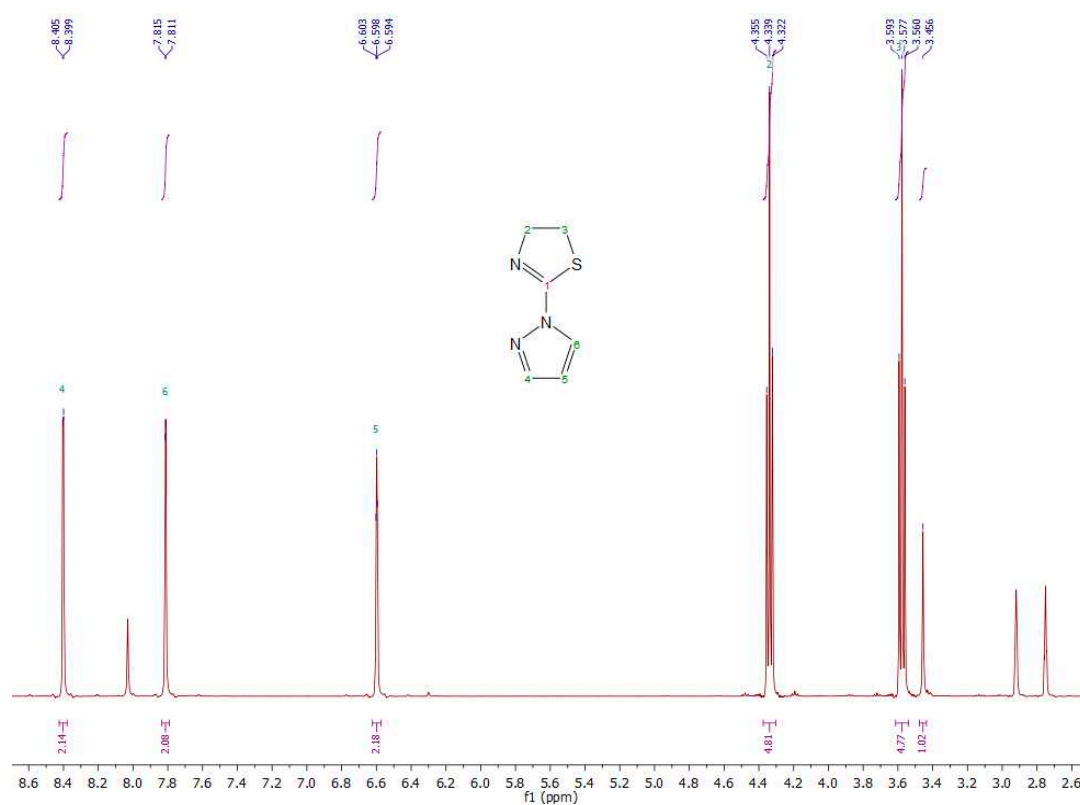

**Figure S8.** <sup>1</sup>H NMR spectrum of PzTn in DMF-d<sub>7</sub>.

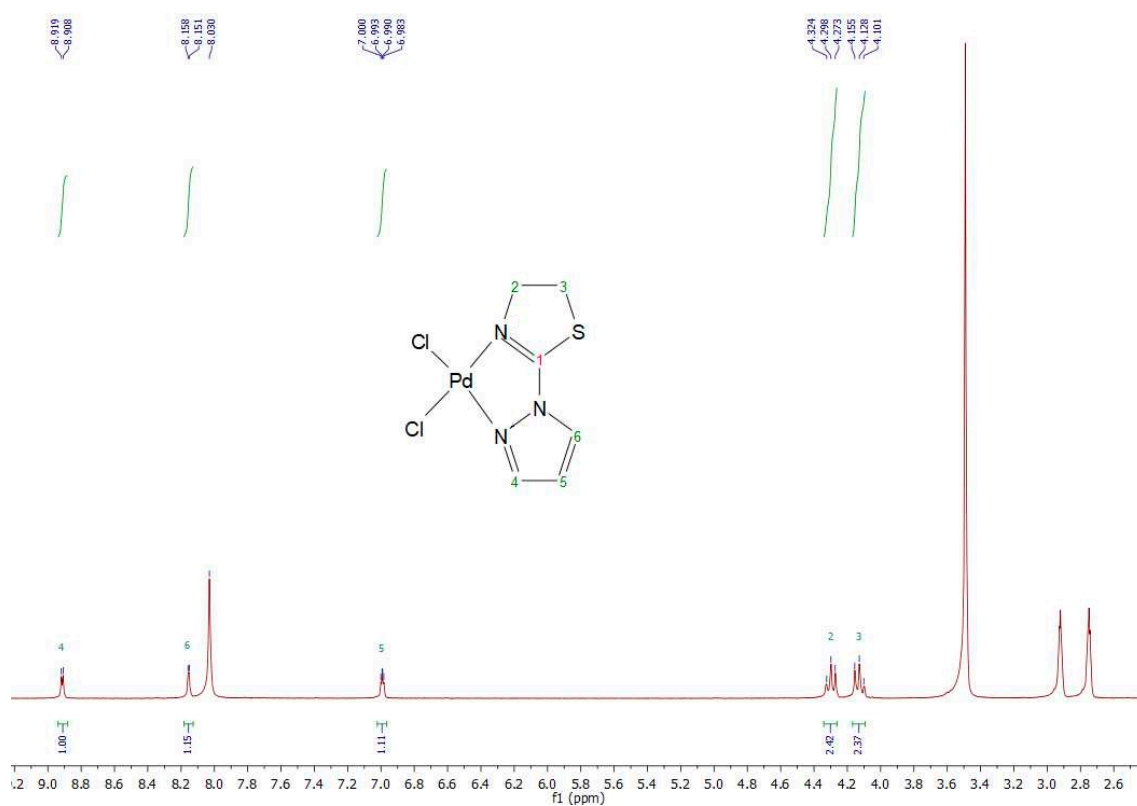

**Figure S9.** <sup>1</sup>H NMR spectrum of PdPzTn in DMF-d<sub>7</sub>.

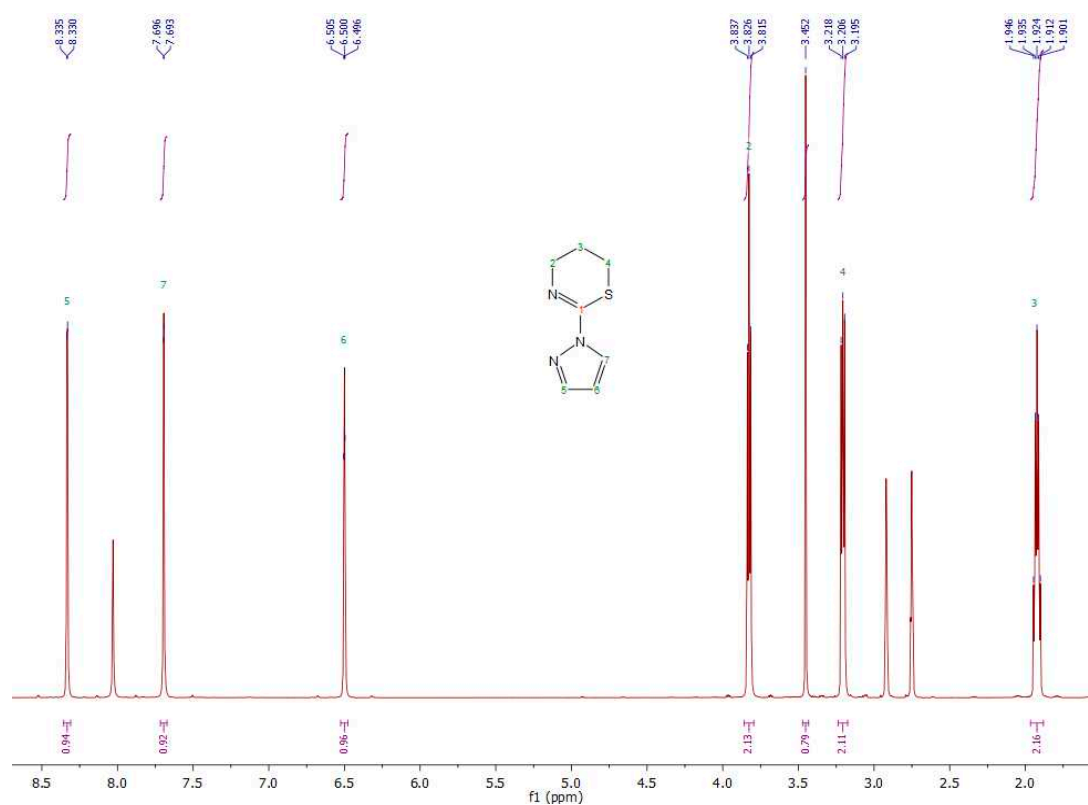

**Figure S10.**  $^1\text{H}$  NMR spectrum of PzTz in  $\text{DMF-d}_7$ .

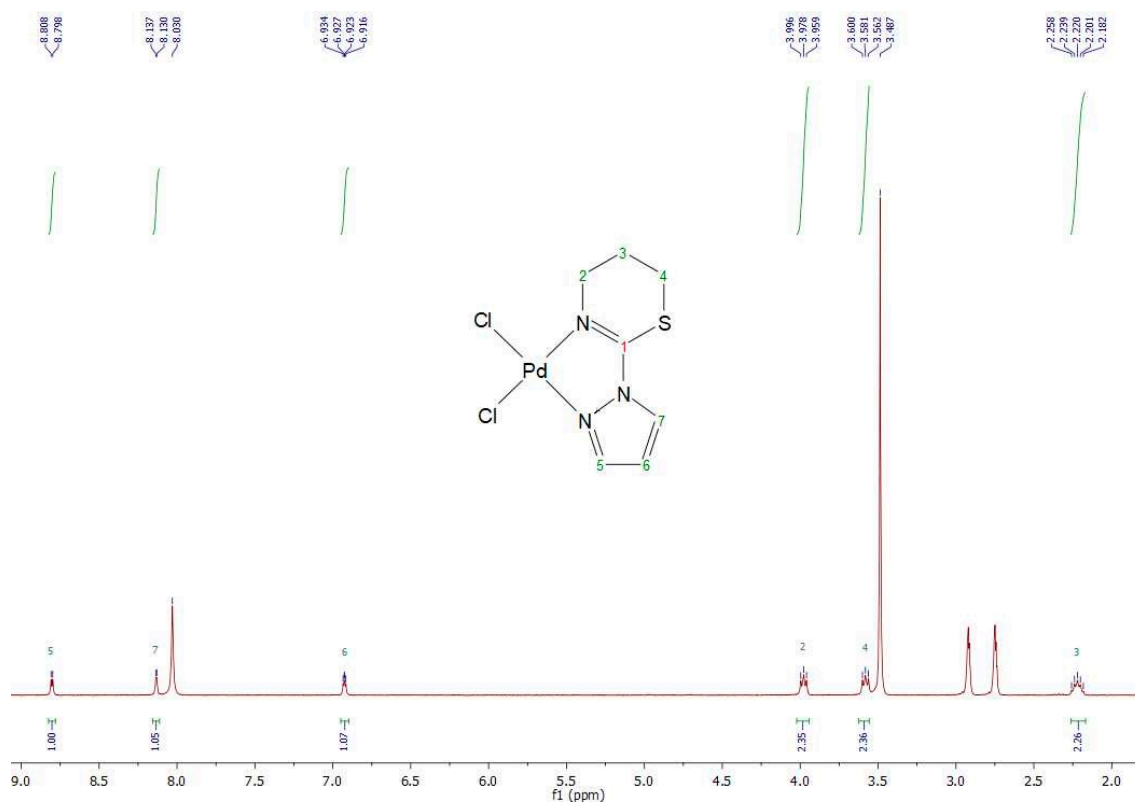

**Figure S11.**  $^1\text{H}$  NMR spectrum of PdPzTz in  $\text{DMF-d}_7$ .

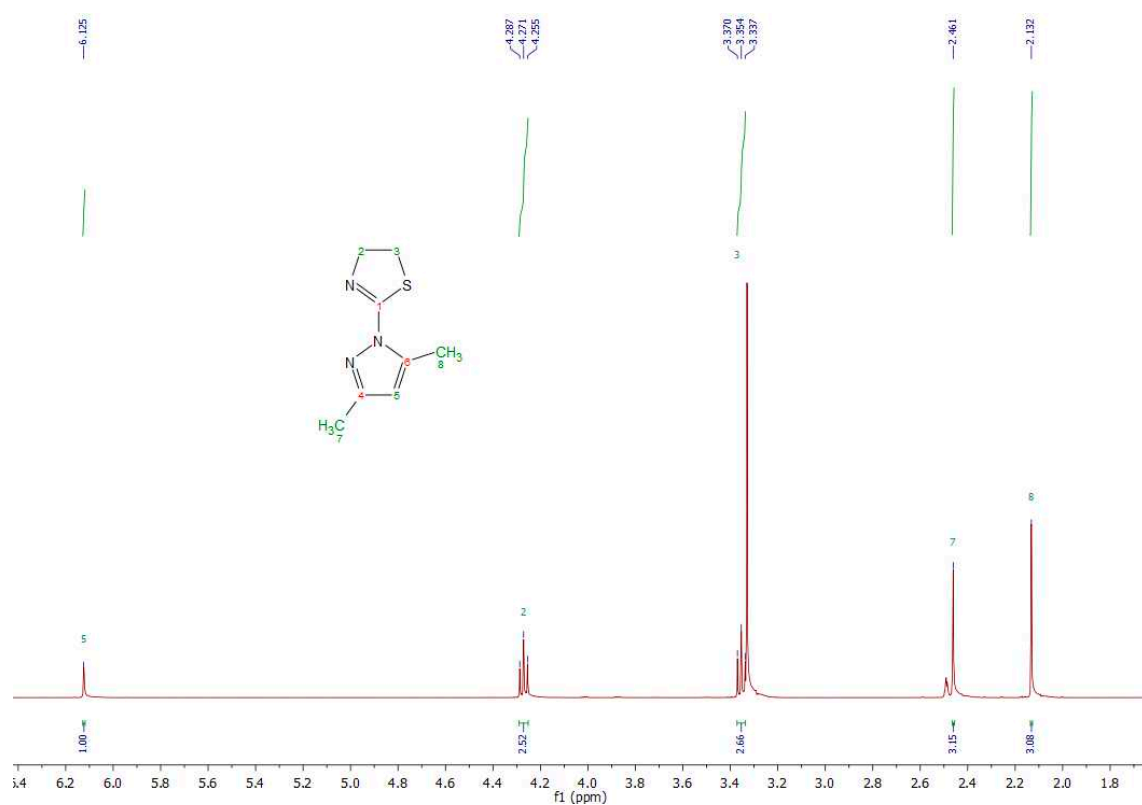

**Figure S12.**  $^1\text{H}$  NMR spectrum of DMPzTn in  $\text{DMSO-d}_6$ .

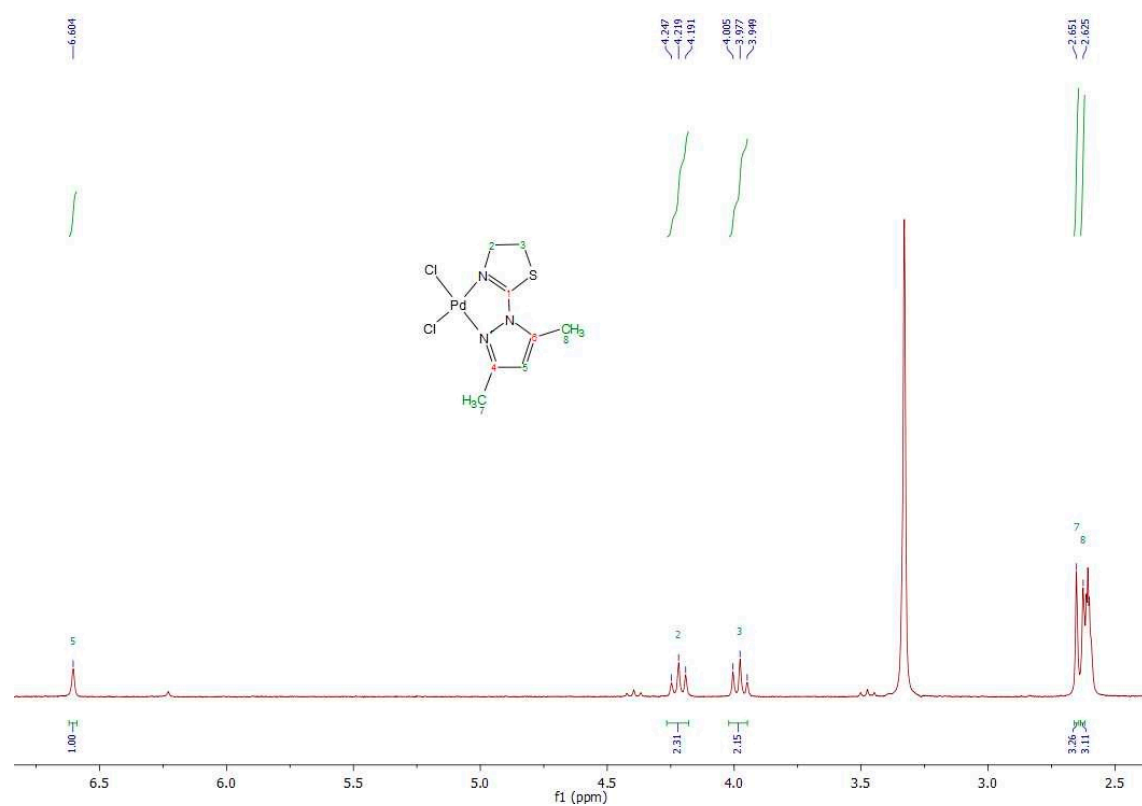

**Figure S13.**  $^1\text{H}$  NMR spectrum of PdDMPzTn in  $\text{DMSO-d}_6$ .

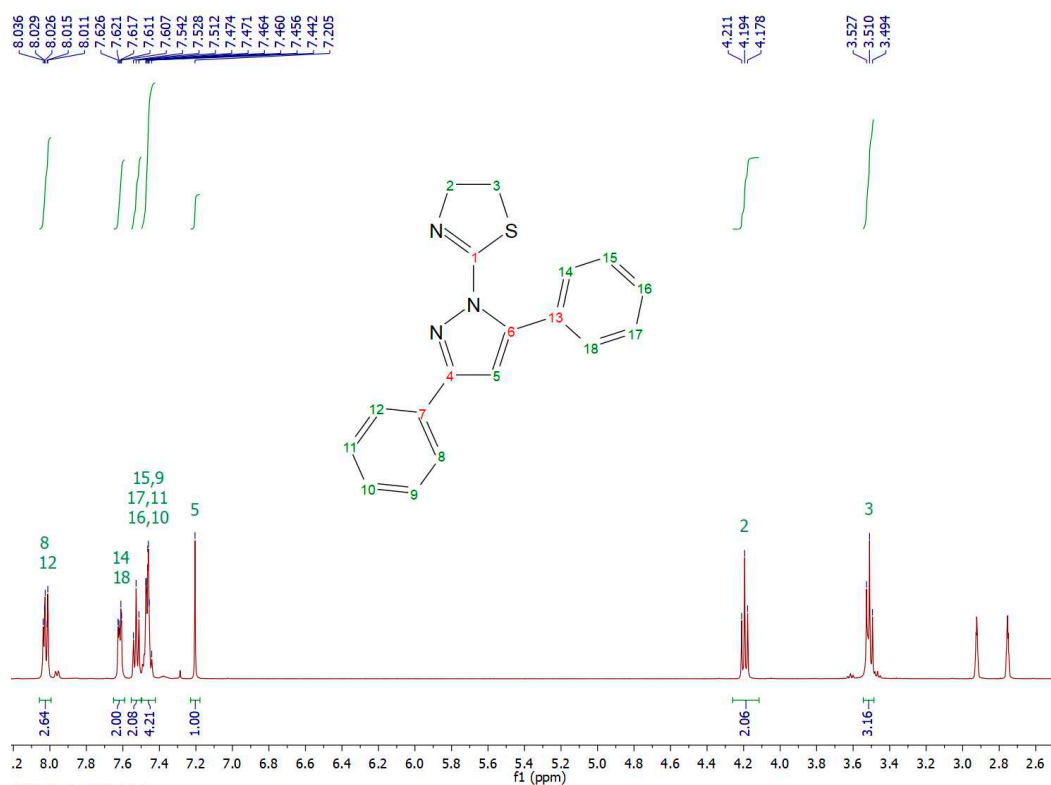

**Figure S14.** <sup>1</sup>H NMR spectrum of DPhPzTn in DMF-d<sub>7</sub>.

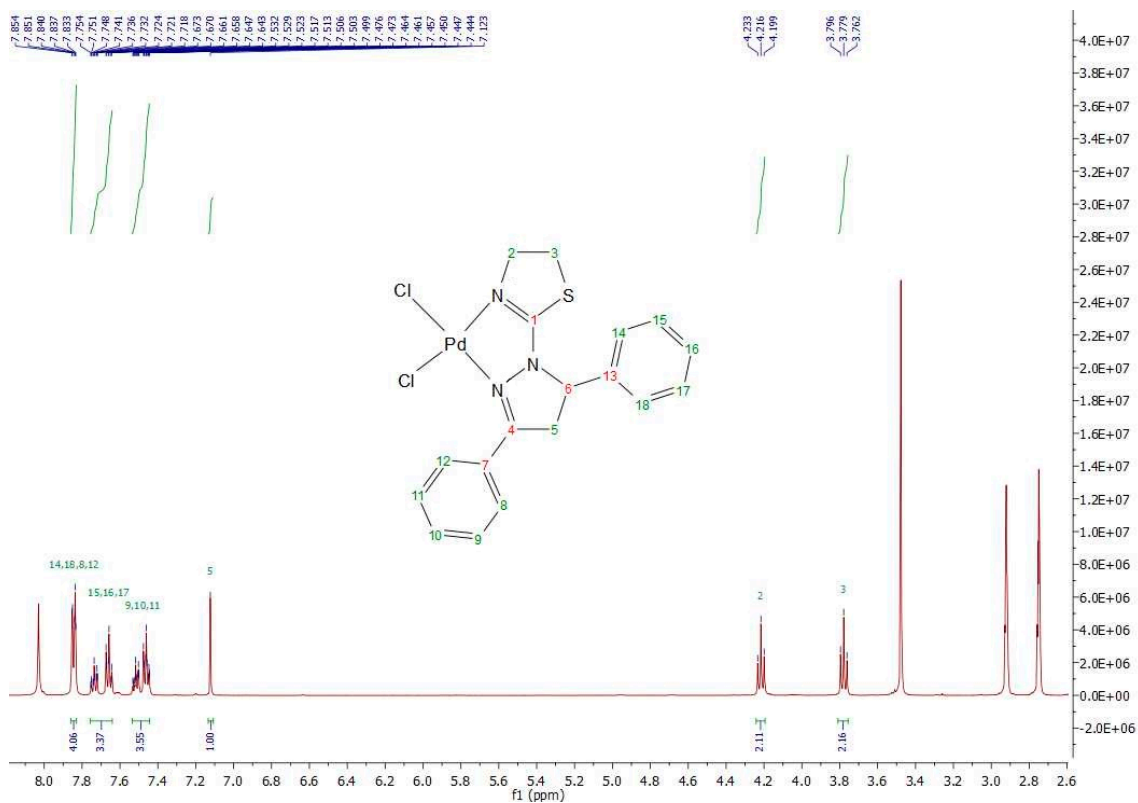

**Figure S15.** <sup>1</sup>H NMR spectrum of PdDPhPzTn in DMF-d<sub>7</sub>.

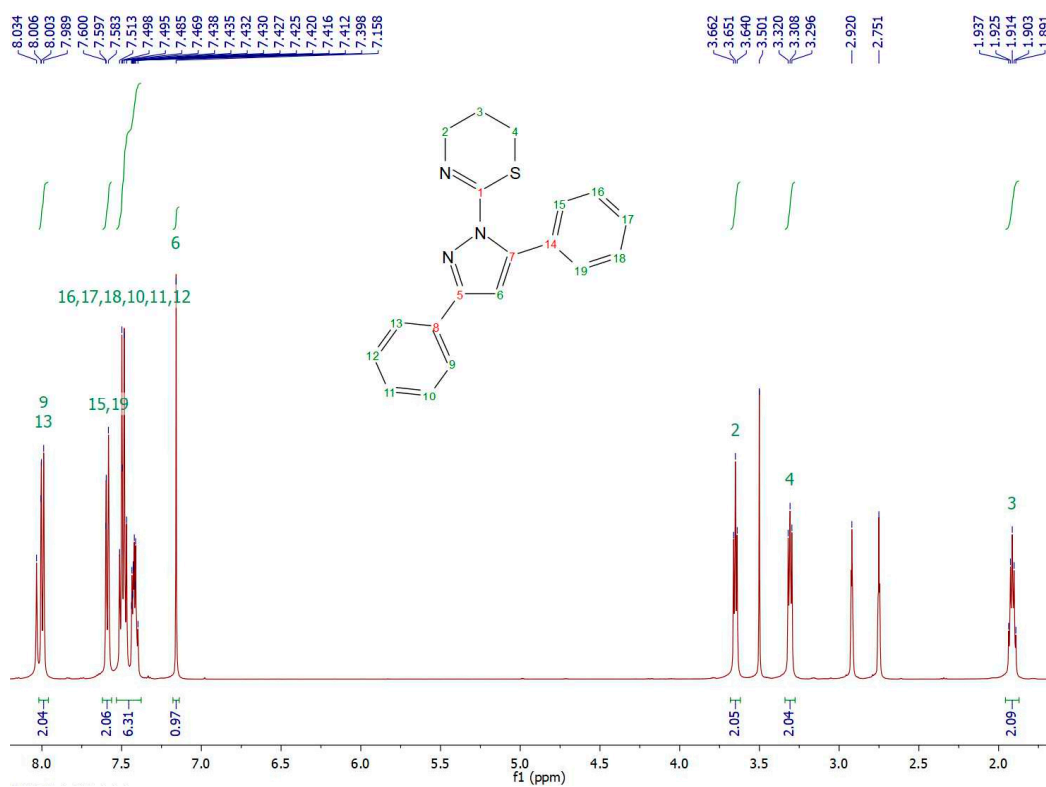

**Figure S16.** <sup>1</sup>H NMR spectrum of DPhPzTz in DMF-d<sub>7</sub>.

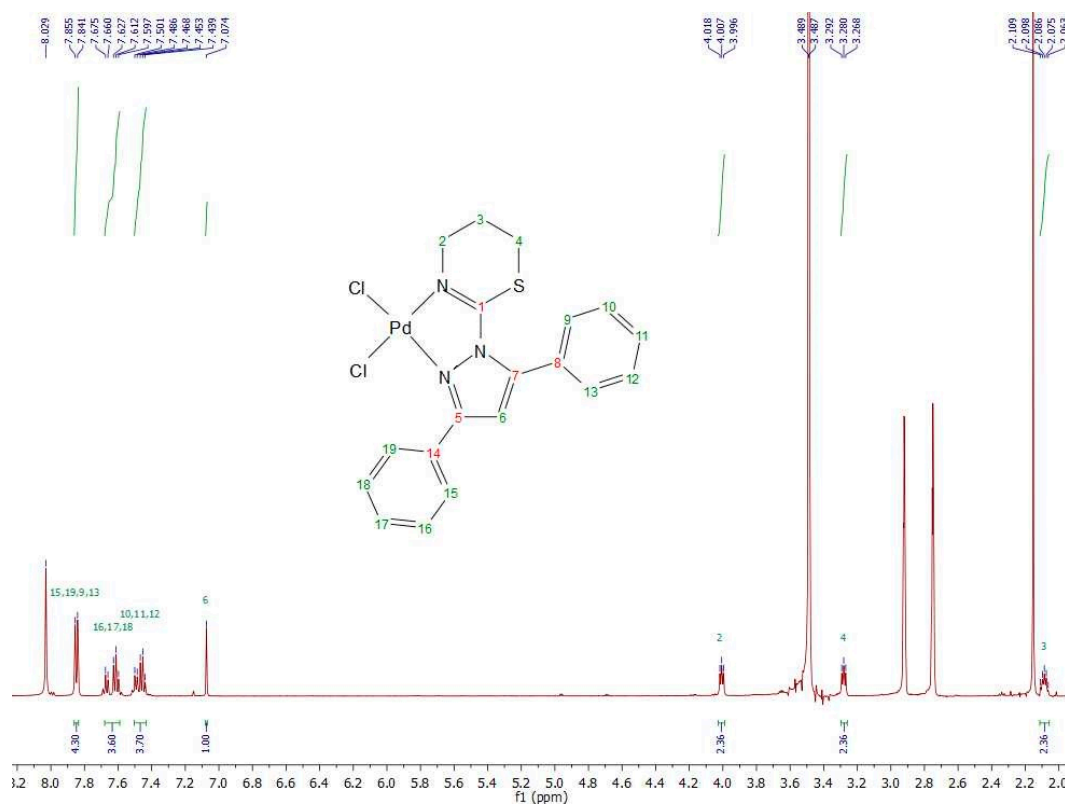

**Figure S17.** <sup>1</sup>H NMR spectrum of PdDPhPzTz in DMF-d<sub>7</sub>.

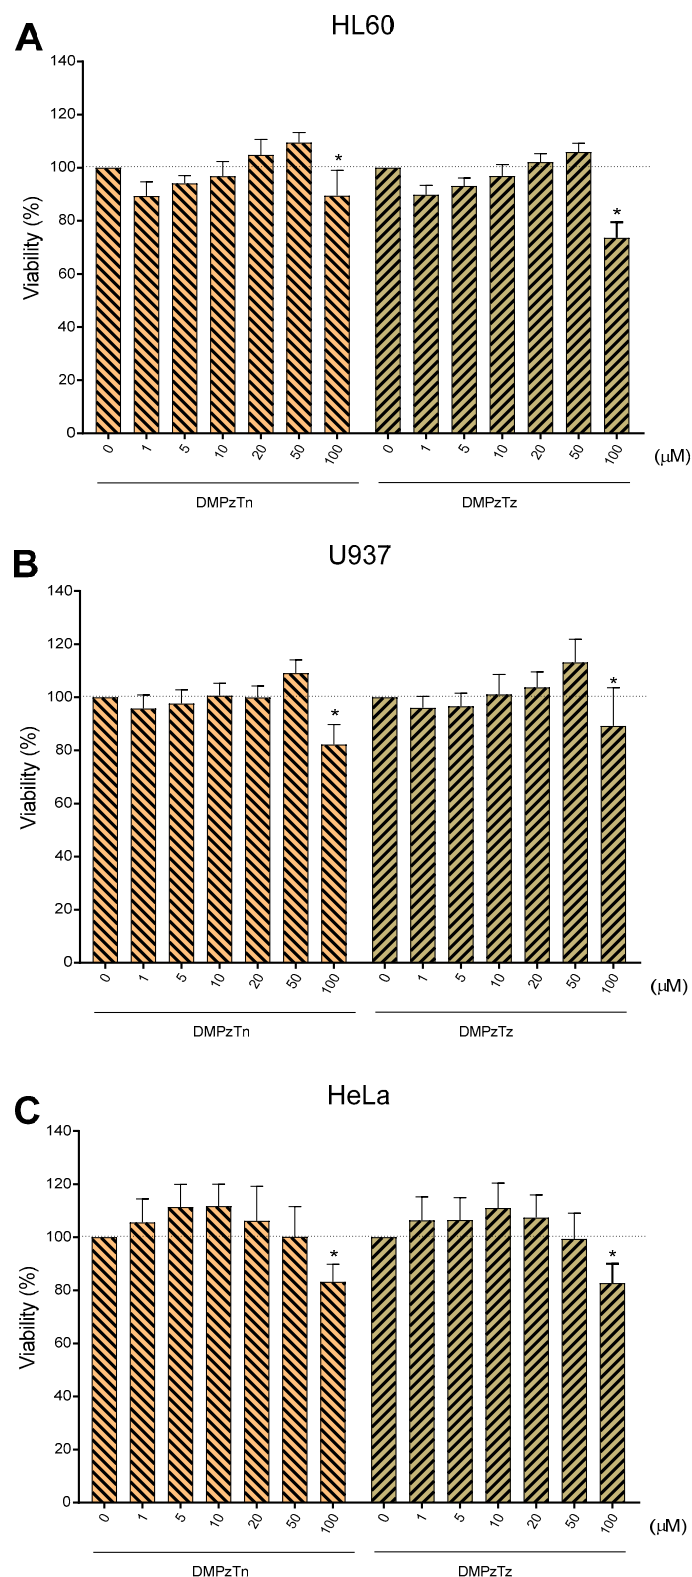

**Figure S18.** Dose-response curves of the pyrazole/thiazoline ligands on cell viability. HL-60 (A), U-937 (B), and HeLa (C) cells were treated for 24 h with increasing concentrations (0-100 μM, as indicated) of the ligands DMPzTn and DMPzTz, or the vehicle (DMSO, control). Data represent means  $\pm$  S.D. of 5 independent experiments and are expressed as percentage of control values. \* $P < 0.05$  compared to their corresponding control values.

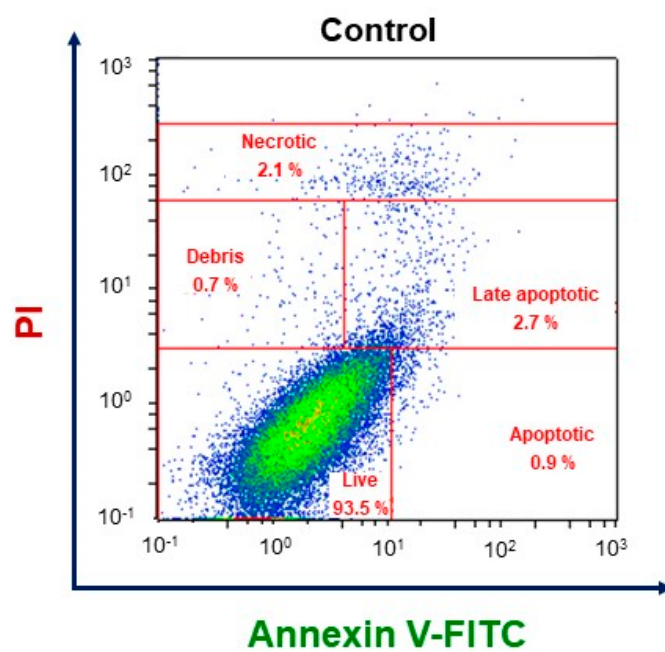

**Figure S19.** Representative cytogram of untreated HeLa cells stained with annexin V-FITC in the presence of propidium iodide (PI).
